# Supplementary material for: Highly stable and stretchable graphene–polymer processed silver nanowires hybrid electrodes for flexible displays
Source: Royal Society of Chemistry journal article supplement (doi:10.1039/c4tc02448f), 2014-12-10
Supplement: c4tc02448f2.pdf [file c4tc02448f2.pdf]

## Supporting Information

# High-stable and Stretchable Graphene-Polymer processed Silver Nanowires Hybrid Electrodes for Flexible Displays

Qi Zhang,<sup>a</sup> Yanfei Di,<sup>a</sup> Chad M. Huard,<sup>b</sup> L. Jay Guo,<sup>b</sup> Jie Wei,<sup>a</sup> Jinbao Guo<sup>a\*</sup>

<sup>a</sup>College of Materials Science and Engineering, Beijing University of Chemical  
Technology, Beijing 100029, P. R. China

<sup>b</sup>Department of Electrical Engineering and Computer Science, University of Michigan,  
Ann Arbor, Michigan 48109

\*To whom correspondence should be addressed.

guojb@mail.buct.edu.cn

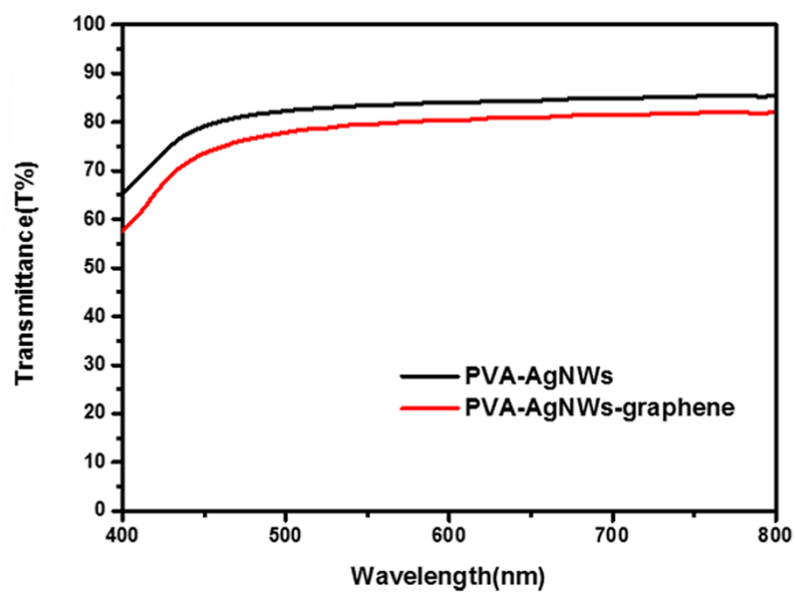

Fig. S1 Optical transmittance spectra of PVA-AgNWs film and PVA encapsulated AgNWs-graphene hybrid film on PET substrate

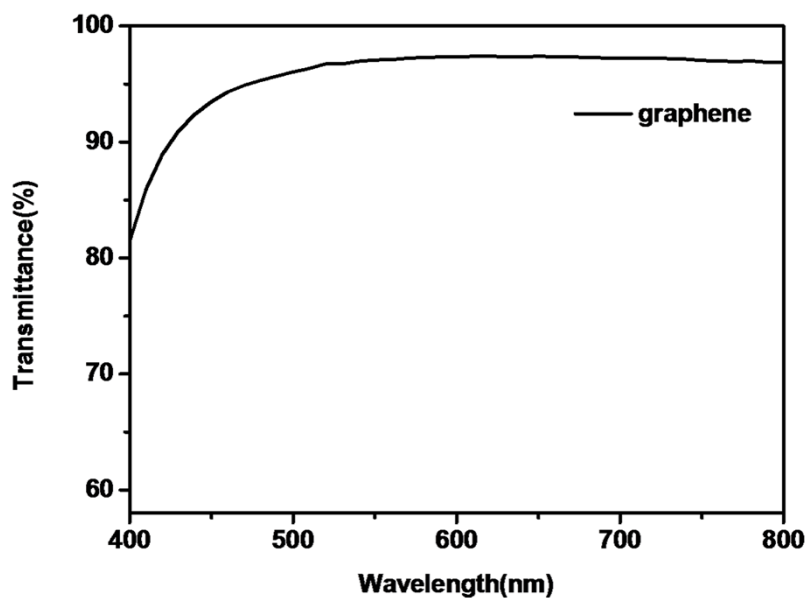

Fig. S2 Optical transmittance spectra of graphene on PET substrate
